# Supplementary material for: Accurately controlling the hierarchical nanostructure of polyamide membranesviaelectrostatic atomization-assisted interfacial polymerization
Source: Royal Society of Chemistry journal article supplement (doi:10.1039/d0ta02150d), 2020-01-01
Supplement: d0ta02150d1.pdf [file d0ta02150d1.pdf]

## Supporting Information

### Accurately controlling the hierarchical nanostructure of polyamide membrane *via* electrostatic atomization-assisted interfacial polymerization

Jingjing Chen<sup>a,1</sup>, Jie Zhang<sup>a,1</sup>, Xiaoli Wu<sup>a</sup>, Xulin Cui<sup>a</sup>, Wenpeng Li<sup>a,\*</sup>, Haoqin Zhang<sup>a</sup>,  
Jingtao Wang<sup>a,b,\*</sup>, Xingzhong Cao<sup>c</sup>, Peng Zhang<sup>c</sup>

<sup>a</sup>School of Chemical Engineering, Zhengzhou University, Zhengzhou 450001, P. R. China

<sup>b</sup>Henan Institutes of Advanced Technology, Zhengzhou University, 97 Wenhua Road, Zhengzhou  
450003, P. R. China

<sup>c</sup>Multi-discipline Research Division, Institute of High Energy Physics, Chinese Academy of  
Sciences, Beijing 100049, P. R. China

\*To whom correspondence should be addressed: E-mail: lwp0103@163.com (W.P. Li);  
jingtaowang@zzu.edu.cn (J.T. Wang).

<sup>1</sup>These authors contributed equally to this work.

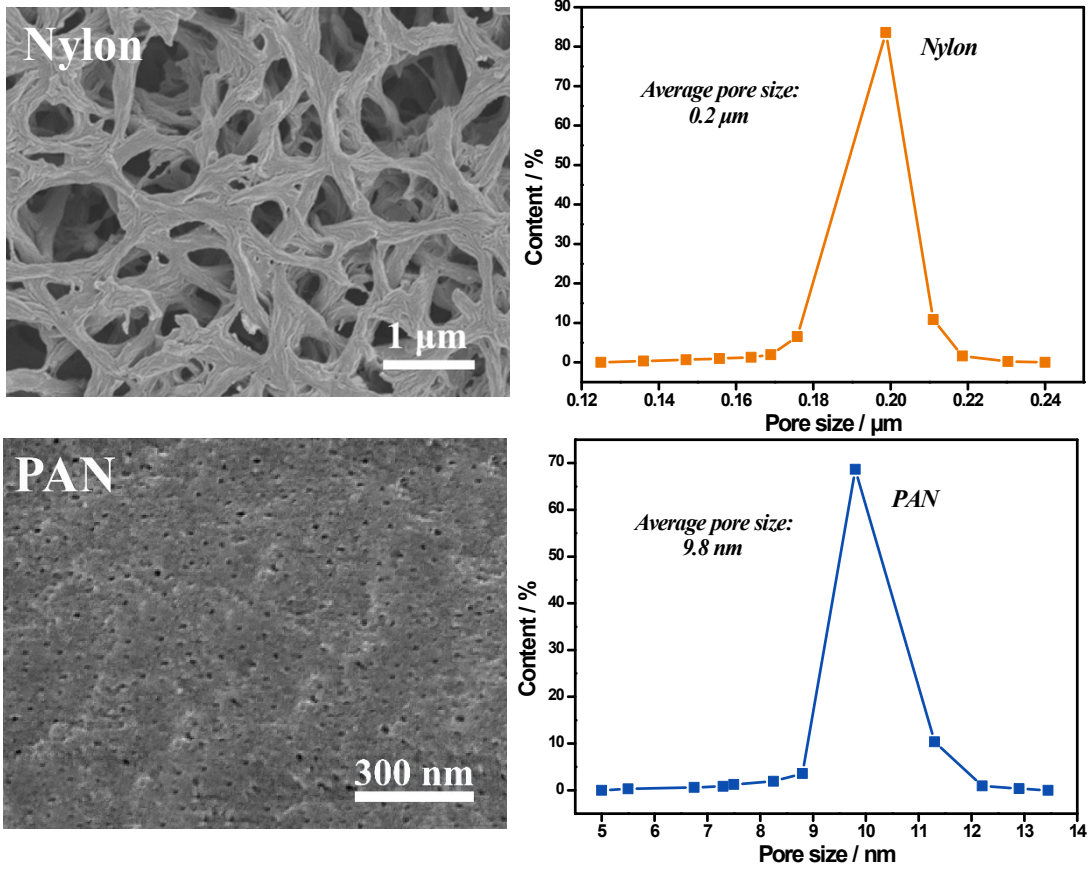

**Fig. S1.** SEM images of nylon and PAN substrates and the corresponding pore size distribution.

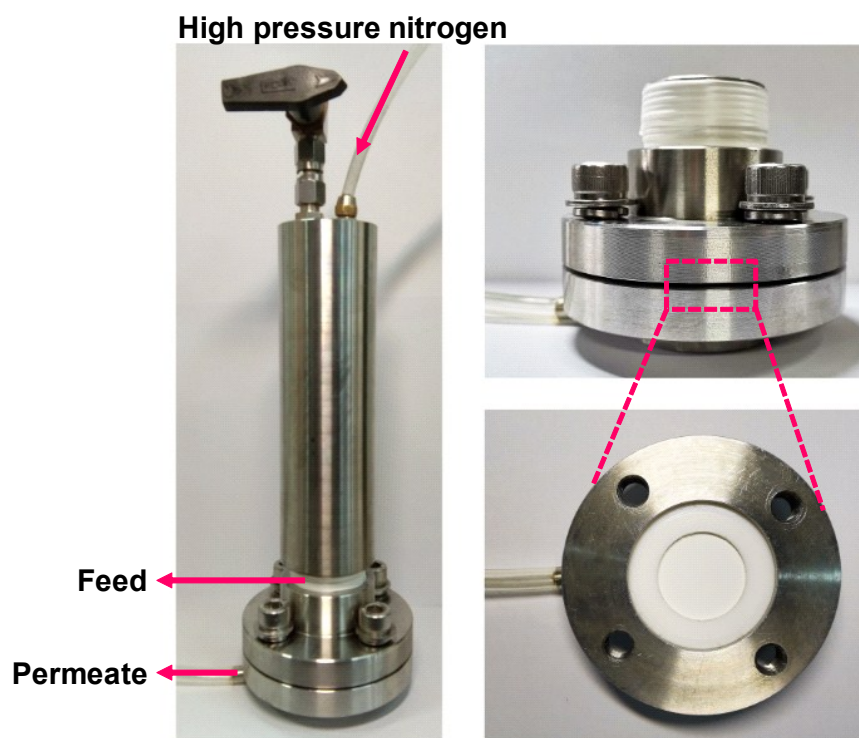

**Fig. S2.** The home-made device for the nanofiltration performance evaluation of membranes.

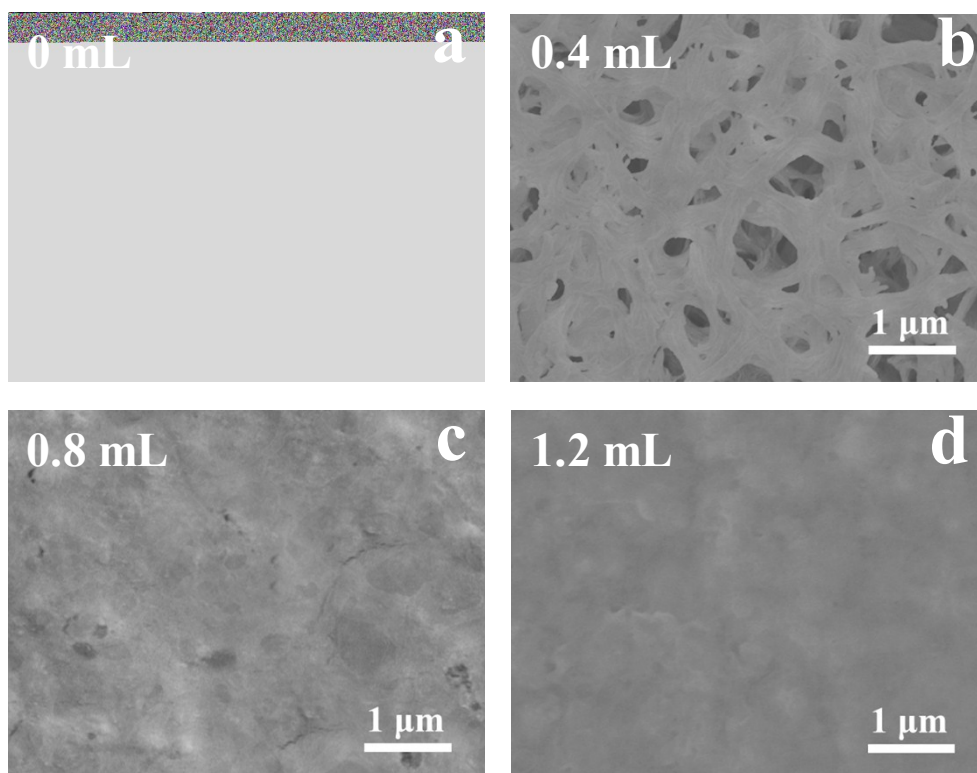

**Fig. S3.** SEM images of TMC<sub>0.001</sub> membrane with different monomer amounts.

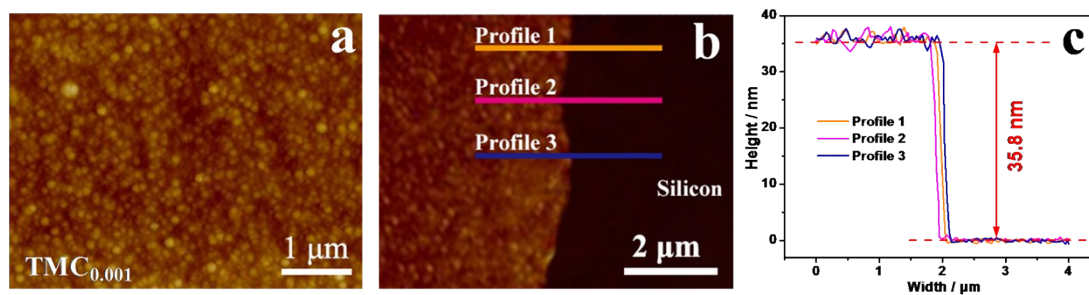

**Fig. S4.** (a) AFM image of TMC<sub>0.001</sub> membrane on nylon substrate, (b) AFM height image and (c) corresponding height profiles of TMC<sub>0.001</sub> membrane with same monomer amounts on silicon wafer.

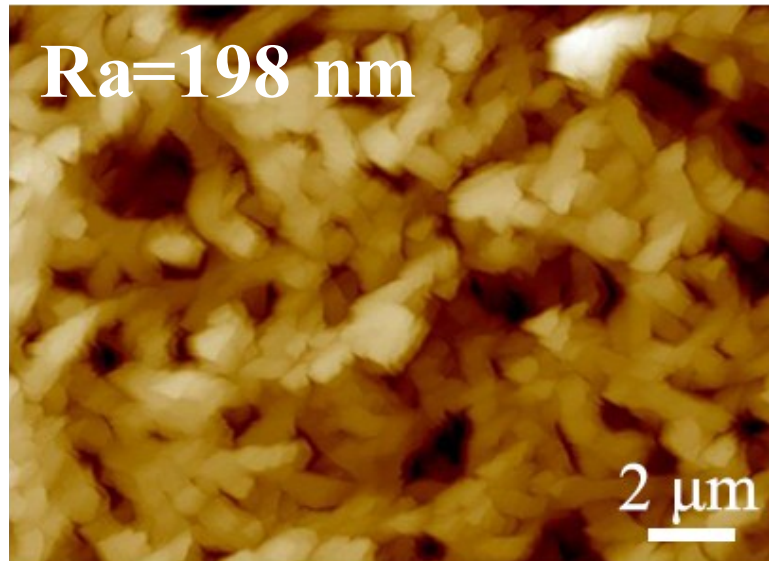

**Fig. S5.** AFM image of nylon substrate.

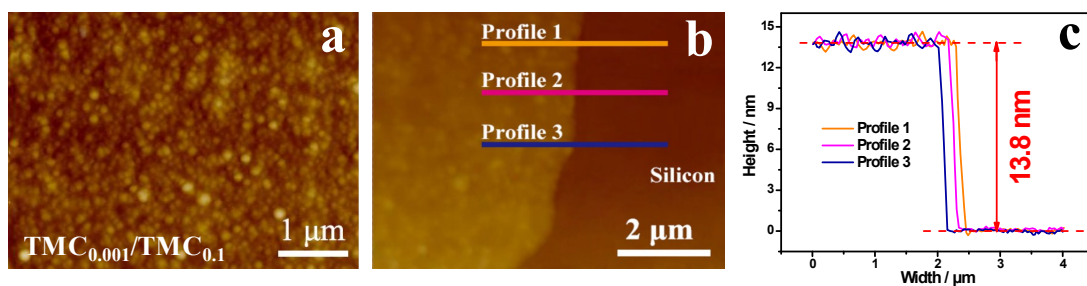

**Fig. S6.** (a) AFM image of TMC<sub>0.001</sub>/TMC<sub>0.1</sub> membrane on nylon substrate, (b) AFM height image and (c) corresponding height profiles of TMC<sub>0.1</sub> membrane with same monomer amounts as the dense layer in TMC<sub>0.001</sub>/TMC<sub>0.1</sub> on silicon wafer.

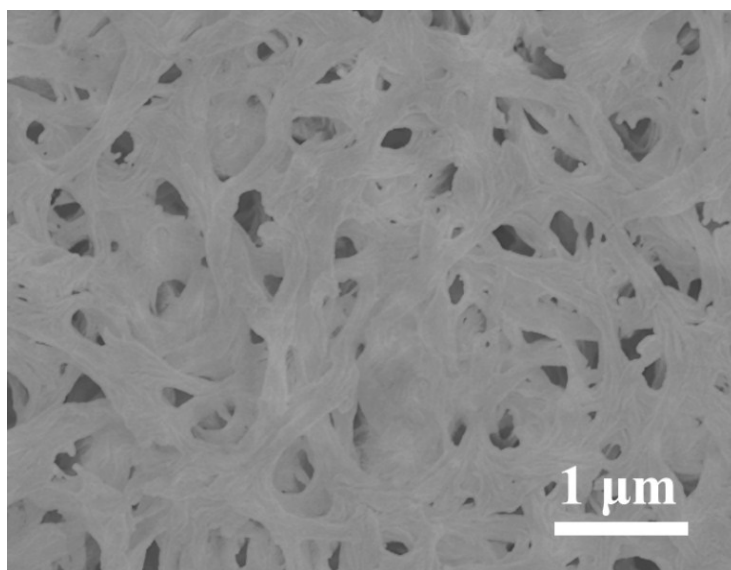

**Fig. S7.** SEM image of TMC<sub>0.1</sub> membrane with same monomer amounts as the dense layer in TMC<sub>0.001</sub>/TMC<sub>0.1</sub> directly prepared on nylon substrate.



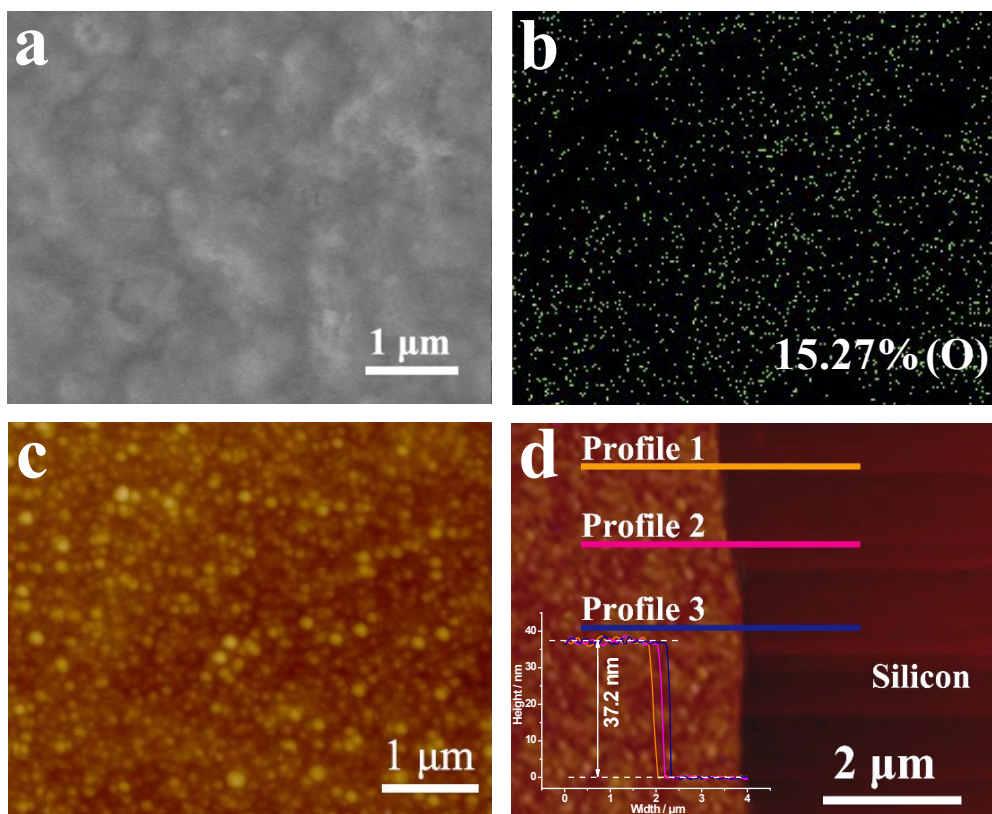

**Fig. S8.** (a) SEM image, (b) O elemental mapping, and (c) AFM image of defect-free TMC<sub>0.1</sub> membrane. (d) AFM height image of TMC<sub>0.1</sub> membrane with the same monomer amount but on silicon wafer (Inset is the corresponding height profiles).

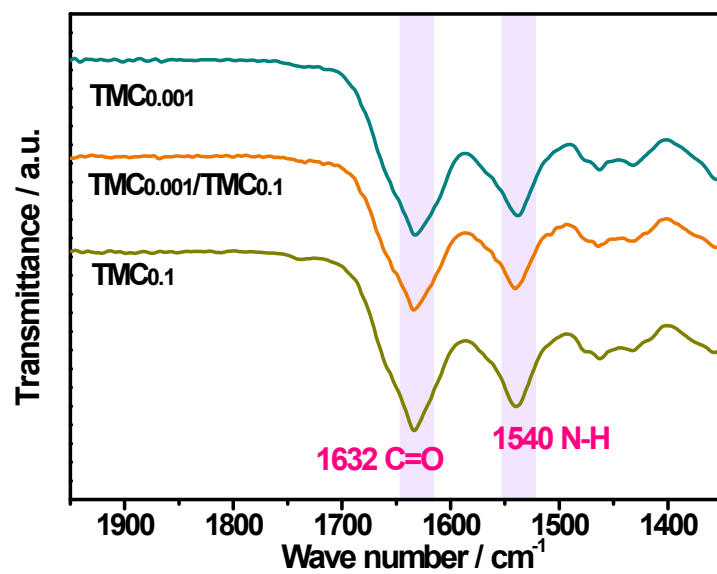

Fig. S9. FTIR spectra of TMC<sub>0.001</sub>, TMC<sub>0.001</sub>/TMC<sub>0.1</sub>, and TMC<sub>0.1</sub> membranes.

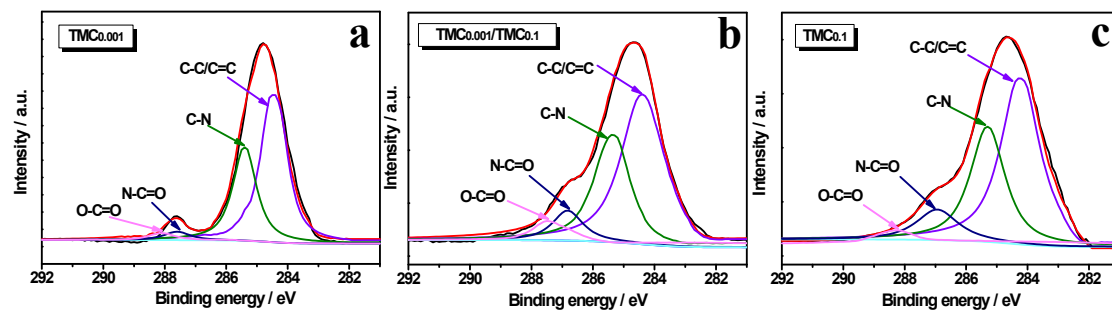

**Fig. S10.** High resolution C 1s spectra of TMC<sub>0.001</sub>, TMC<sub>0.001</sub>/TMC<sub>0.1</sub>, and TMC<sub>0.1</sub> membranes.

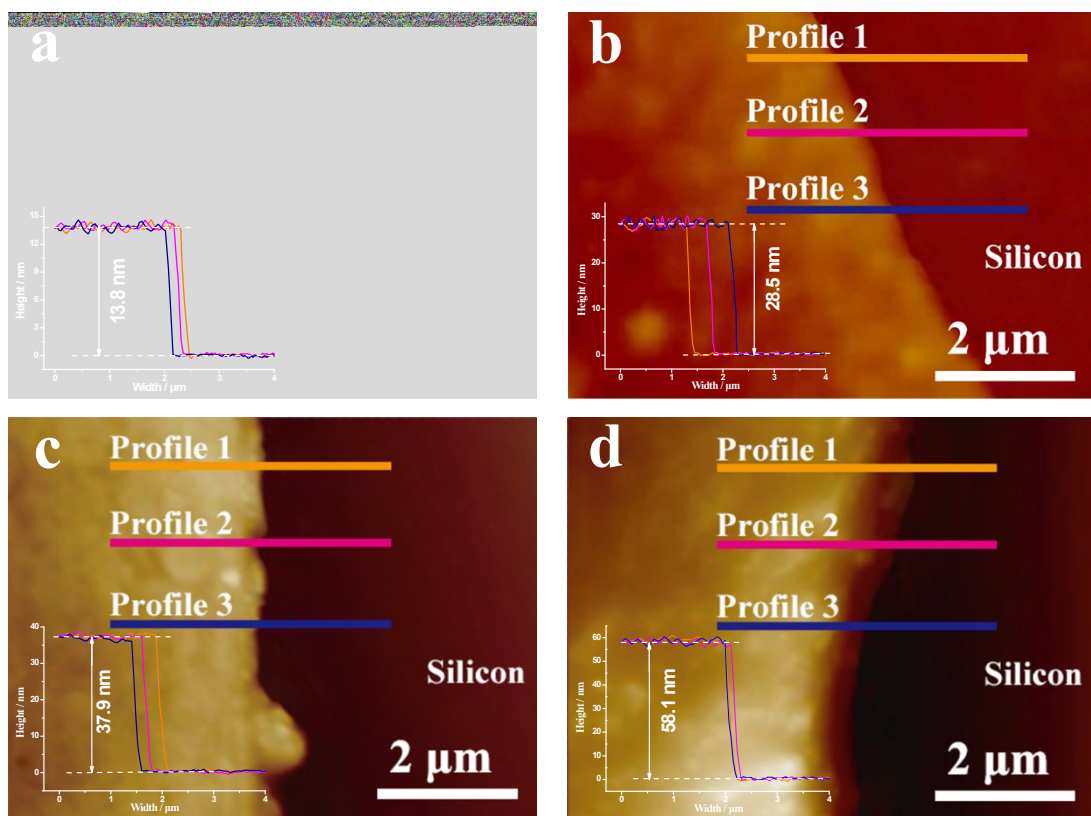

**Fig. S11.** AFM images of TMC<sub>0.1</sub> membranes at (a) 0.4 ml, (b) 0.8 ml, (c) 1.2 ml, and (d) 1.6 ml monomer solutions (Insets are corresponding height profiles).

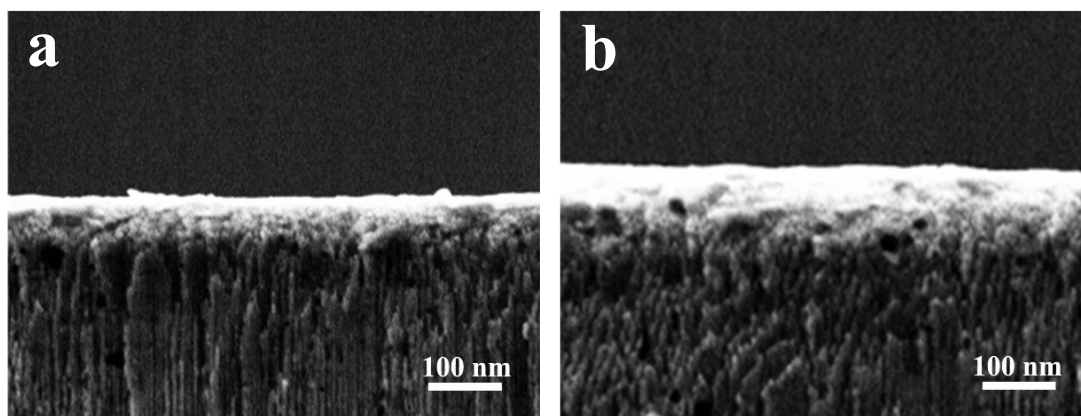

**Fig. S12.** Cross-sectional SEM images of TMC<sub>0.1</sub> membrane sprayed for (a) 5 h and (b) 10 h.

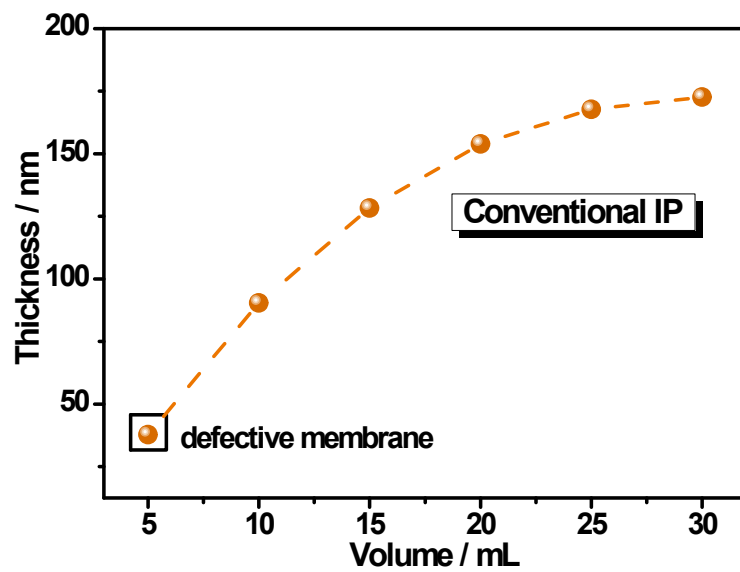

Fig. S13. Thickness of conventional IP membranes as a functional of monomer amounts.

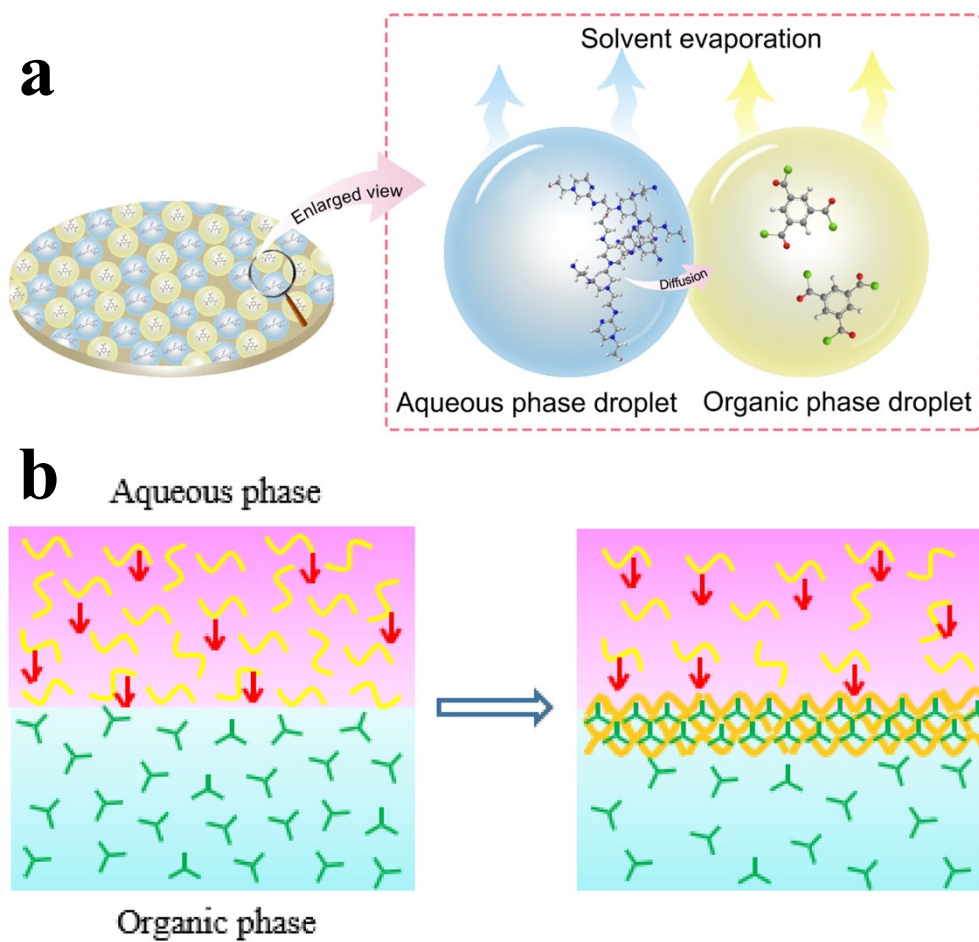

**Fig. S14.** The comparison of schematic diagram between (a) electrostatic atomization-assisted and (b) conventional interfacial polymerization<sup>1</sup>.

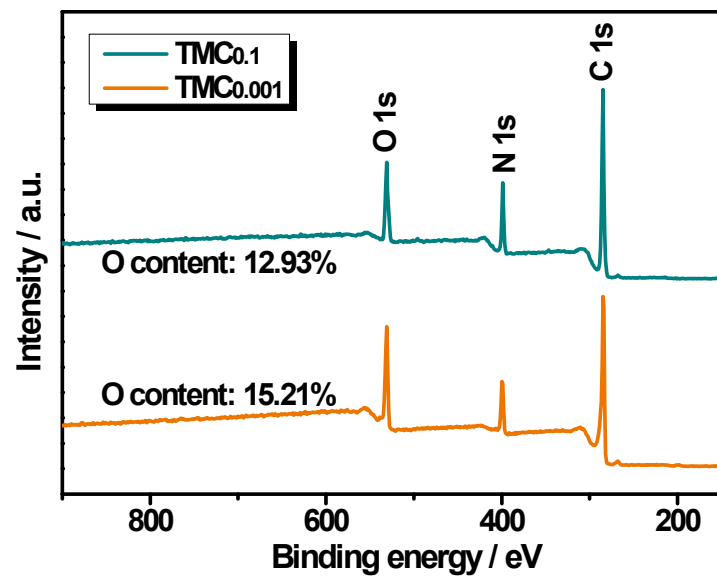

**Fig. S15.** XPS spectra of the TMC<sub>0.1</sub> and TMC<sub>0.001</sub> membranes whose aqueous phase monomer is *p*-phenylenediamine (PPD).



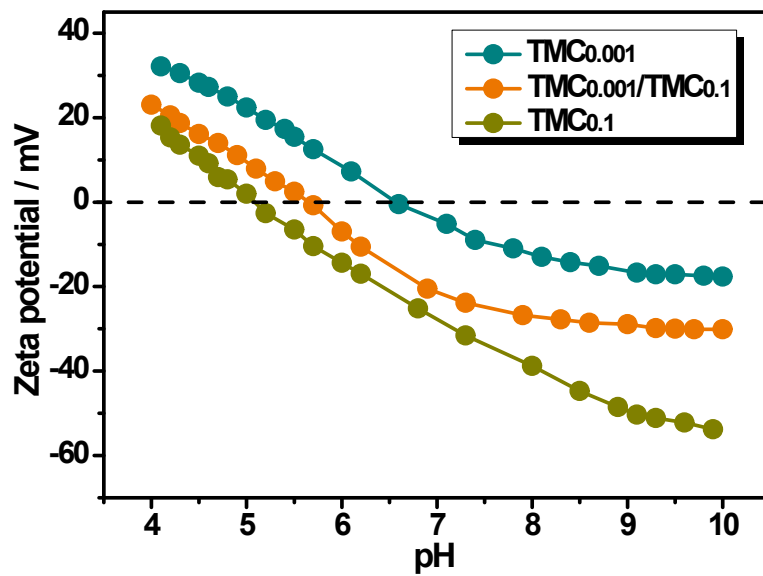

Fig. S16. Zeta potential of TMC<sub>0.001</sub>, TMC<sub>0.001</sub>/TMC<sub>0.1</sub>, and TMC<sub>0.1</sub> membranes at different pH.

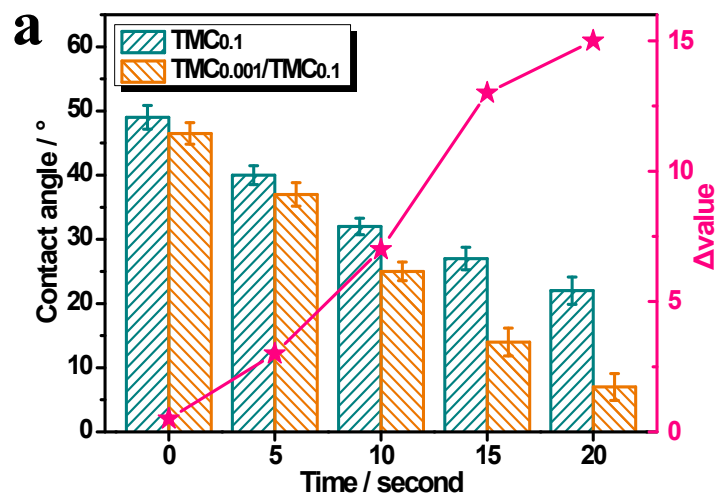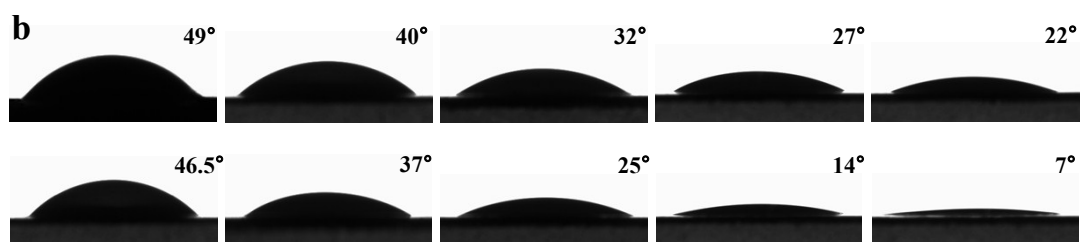

**Fig. S17.** (a) Contact angles of TMC<sub>0.1</sub> and TMC<sub>0.001</sub>/TMC<sub>0.1</sub> membranes as well as (b) the corresponding photos.

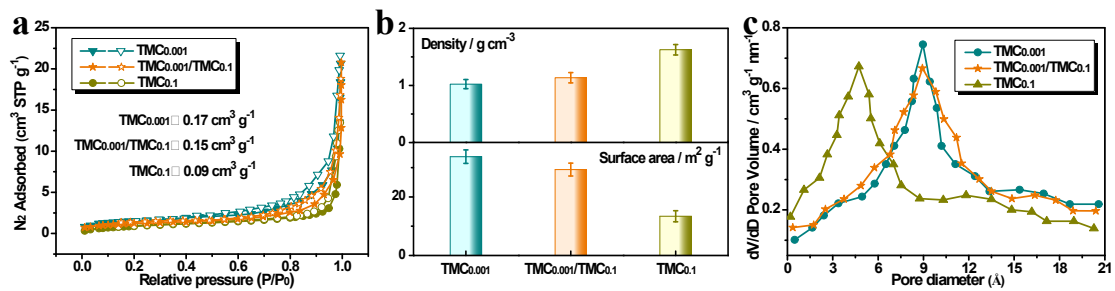

**Fig. S18.** (a) N<sub>2</sub> adsorption/desorption isotherms, (b) calculated surface area and density, and (c) pore diameter distribution of TMC<sub>0.001</sub>, TMC<sub>0.001</sub>/TMC<sub>0.1</sub>, and TMC<sub>0.1</sub> membranes.

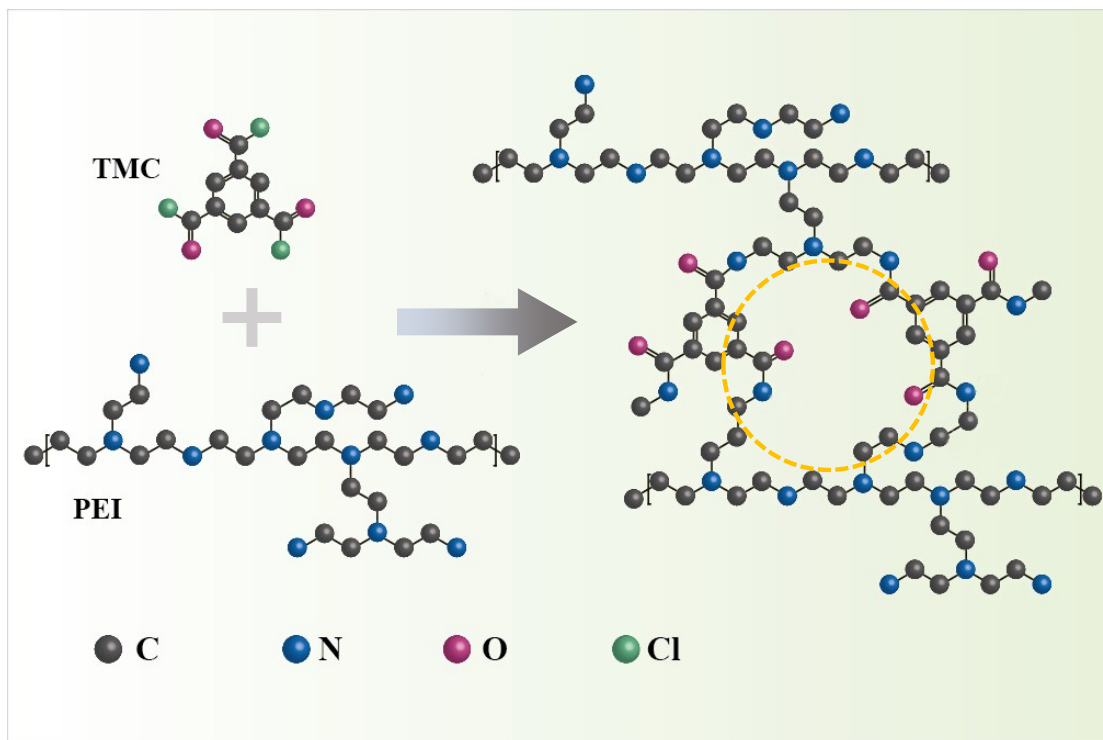

**Fig. 19.** The reaction diagram of PEI and TMC as well as the formed nanopore.

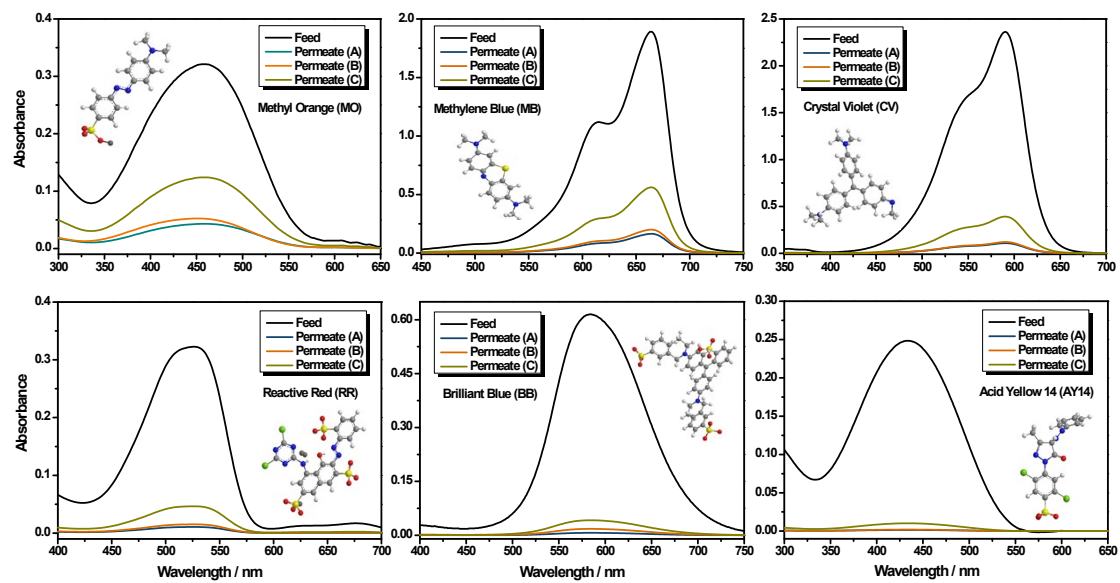

**Fig. S20.** UV-vis spectra of dyes with different sizes in methanol solution before and after filtration through (A) TMC<sub>0.001</sub>, (B) TMC<sub>0.001</sub>/TMC<sub>0.1</sub>, and (C) TMC<sub>0.1</sub> membranes.

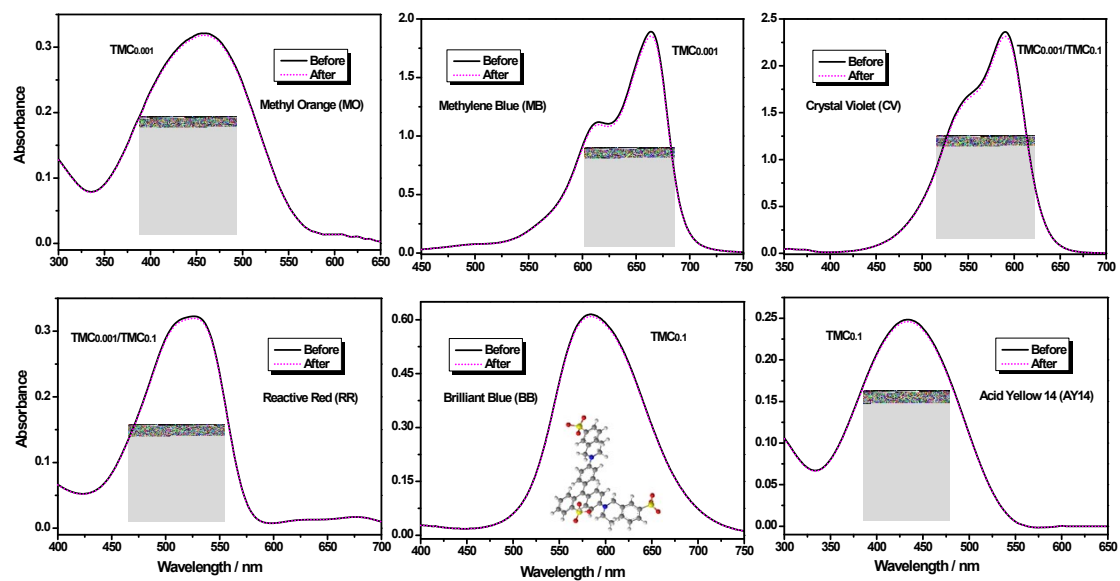

**Fig. S21.** UV-vis absorption spectra of dye solutions before and after membrane immersion for 3 hours.

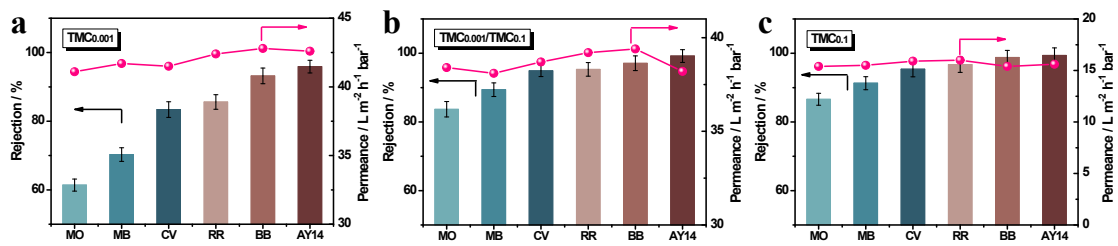

**Fig. S22.** Dyes rejection and methanol permeance of (a)  $TMC_{0.001}$ , (b)  $TMC_{0.001}/TMC_{0.1}$ , and (c)  $TMC_{0.1}$  membranes.

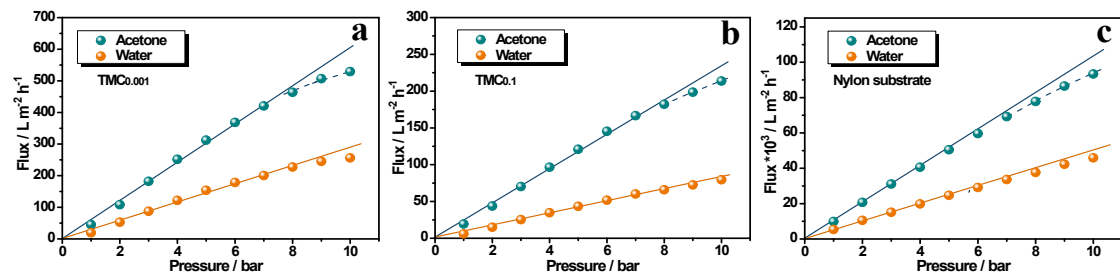

**Fig. S23.** Acetone and water fluxes of (a) TMC<sub>0.001</sub> and (b) TMC<sub>0.1</sub> membranes as well as (c) nylon substrate as a function of operation pressure.



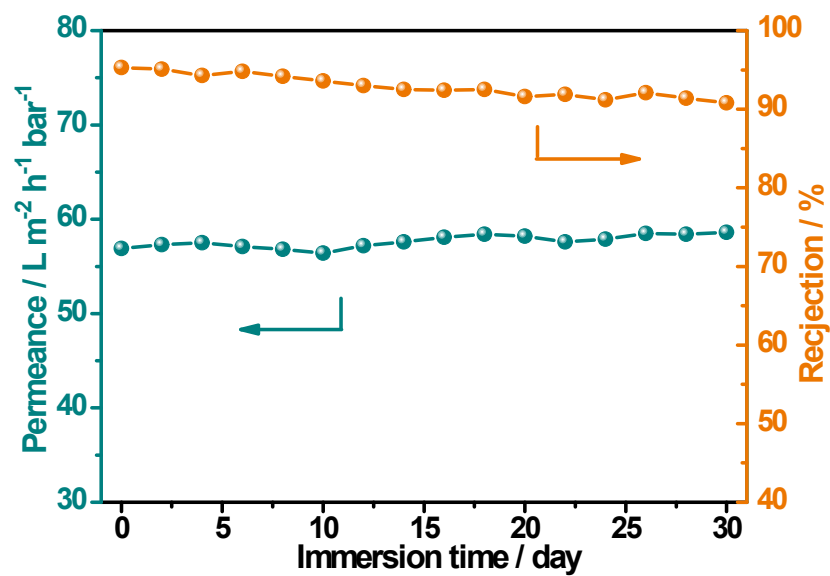

Fig. S24. Long-term water stability of TMC<sub>0.001</sub>/TMC<sub>0.1</sub> membrane (pH=4.0).

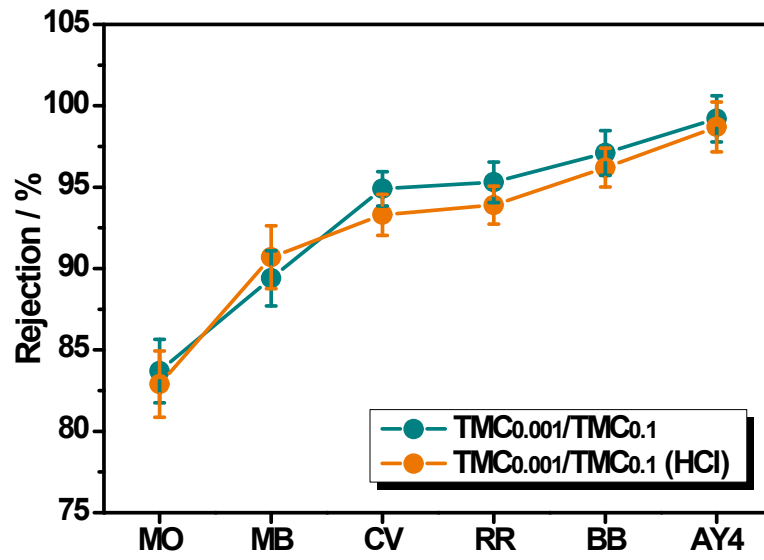

Fig. S25. Rejection of TMC<sub>0.001</sub>/TMC<sub>0.1</sub> membrane before and after HCl treatment for one month.

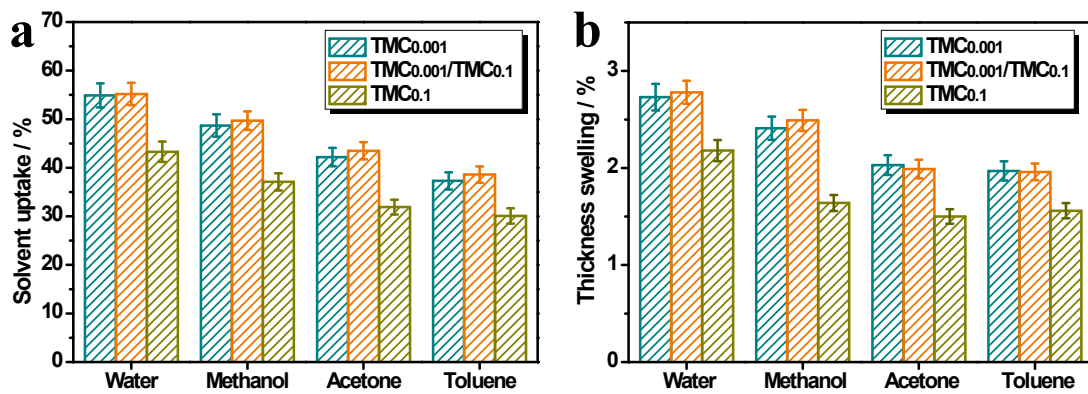

**Fig. S26.** (a) Solvent uptake and (b) thickness swelling of TMC<sub>0.001</sub>, TMC<sub>0.001</sub>/TMC<sub>0.1</sub>, and TMC<sub>0.1</sub> membranes.

**Table S1.** Elemental composition of TMC<sub>0.1</sub> and TMC<sub>0.001</sub> membranes formed from PPD was detected by XPS.

| Membrane             | Aqueous phase (w/v) | Organic phase (w/v) | Elemental composition (%) |       |       | Cross-linking degree (%) |
|----------------------|---------------------|---------------------|---------------------------|-------|-------|--------------------------|
|                      |                     |                     | C                         | O     | N     |                          |
| TMC <sub>0.1</sub>   | 0.1%                | 0.1%                | 74.63                     | 12.93 | 12.44 | 94.1                     |
| TMC <sub>0.001</sub> | 0.1%                | 0.001%              | 72.14                     | 15.21 | 11.32 | 56.4                     |

**Table S2.** Dyes properties and nanofiltration performance of TMC<sub>0.001</sub>/TMC<sub>0.1</sub> membrane.

| Dye molecular | Size (nm) | Charge | Methanol permeance (L m <sup>-2</sup> h <sup>-1</sup> bar <sup>-1</sup> ) | Rejection (%) |
|---------------|-----------|--------|---------------------------------------------------------------------------|---------------|
| MO            | 1.0       | –      | 38.4                                                                      | 87.3          |
| MB            | 1.2       | +      | 38.1                                                                      | 89.4          |
| CV            | 1.5       | +      | 38.7                                                                      | 94.9          |
| RR            | 1.5       | –      | 39.2                                                                      | 95.3          |
| BB            | 1.6       | –      | 39.4                                                                      | 97.1          |
| AY14          | 1.9       | –      | 38.2                                                                      | 99.2          |

**Table S3.** Comparison of nanofiltration performance for various membranes.

| Membrane                                 | Thickness of skin layer (nm) | Solute          | Rejection (%) | Water permeance (L m <sup>-2</sup> h <sup>-1</sup> bar <sup>-1</sup> ) | Reference |
|------------------------------------------|------------------------------|-----------------|---------------|------------------------------------------------------------------------|-----------|
| TFCn                                     | 54.9                         | Methyl orange   | 90            | 19.6                                                                   | 2         |
| MDC-IP                                   | 25                           | Acid fuchsin    | 98.5          | 13.8                                                                   | 3         |
| PIP-TMC                                  | 43.6                         | Reactive orange | 95            | 7.11                                                                   | 4         |
| TPT-TMC                                  | 35.1                         | Reactive orange | 97            | 8.68                                                                   | 4         |
| TA/DETA                                  | 57                           | Chrysoidine G   | 98            | 7.9                                                                    | 5         |
| PIP-GO                                   | 20                           | Rhodamine B     | 87            | 24.2                                                                   | 6         |
| NFM-4                                    | 98                           | Safranin T      | 95            | 9.82                                                                   | 7         |
| SRNF                                     | 93                           | Congo red       | 99.9          | 2.7                                                                    | 8         |
| NFM-6                                    | 77                           | Methyl orange   | 95            | 17.6                                                                   | 9         |
| PAN450                                   | 35                           | Methyl blue     | 96            | 5.8                                                                    | 10        |
| SPIF-PA                                  | 17.1                         | Acid fuchsin    | 99            | 0.86                                                                   | 11        |
| IP@FI                                    | 6.5                          | Neutral red     | 96            | 2.7                                                                    | 12        |
| E-spray                                  | 30                           | Methyl orange   | 91            | 2                                                                      | 13        |
| TMC <sub>0.001</sub> /TMC <sub>0.1</sub> | 49.6                         | Acid yellow 14  | 99.2          | 23.7                                                                   | This work |

### Supplementary References

1. L. Shan, J. Gu, H. Fan, S. Ji and G. Zhang, *ACS Appl. Mater. Interfaces*, 2017, **9**, 44820–44827.
2. Y. Li, Y. Su, Y. Dong, X. Zhao, Z. Jiang, R. Zhang and J. Zhao, *Desalination*, 2014, **333**, 59–65.
3. L. Shan, J. Gu, H. Fan, S. Ji and G. Zhang, *ACS Appl. Mater. Interfaces*, 2017, **9**, 44820–44827.
4. Y. Zeng, L. Wang, L. Zhang and J. Q. Yu, *J. Membr. Sci.*, 2018, **546**, 225–233.
5. X. Zhang, Y. Lv, H. Yang, Y. Du and Z. Xu, *ACS Appl. Mater. Interfaces*, 2016, **8**, 32512–32519.
6. R. Hu, Y. He, C. Zhang, R. Zhang, J. Li and H. Zhu, *J. Mater. Chem. A*, 2017, **5**, 25632–25640.
7. Q. An, W. Sun, Q. Zhao, Y. Ji and C. Gao, *J. Membr. Sci.*, 2013, **431**, 171–179.
8. S. Hermans, E. Dom, H. Mariën, G. Koeckelberghs and I. F. J. Vankelecom, *J. Membr. Sci.*, 2015, **476**, 356–363.
9. Y. Mi, F. Zhao, Y. Guo, X. Weng, C. C. Ye and Q. An, *J. Membr. Sci.*, 2017, **541**, 29–38.
10. M. R. Chowdhury, J. Steffes, B. D. Huey and J. R. McCutcheon, *Science*, 2018, **361**, 682–686.
11. M. F. J. Solomon, Y. Bhole and A. G. Livingston, *J. Membr. Sci.*, 2012, **423**, 371–382.
12. Z. Jiang, S. Karan and A. G. Livingston, *Adv. Mater.*, 2018, **30**, 1705973.
13. X. Ma, Z. Yang, Z. Yao, H. Guo, Z. Xu and C. Y. Tang, *Environ. Sci. Technol. Lett.*, 2018, **5**, 117–122.
